# Supplementary material for: Are Endothelial Progenitor Cells the Real Solution for Cardiovascular Diseases? Focus on Controversies and Perspectives
Source: PubMed Central journal article supplement (PMC4609774; doi:10.1155/2015/835934), 2015-10-05
Supplement: 835934.f1.pdf [file 835934.f1.pdf]

**Table 1 supplement Evidence of EPC cells in CVDs and other pathologies**

| STUDIES                   | PATHOLOGIES                                              | VIVO/<br>VITRO       | OBJECTIVES                                                                                                                                                                                                              | CASES                 | SAMPLES                                                    | METHODOLOGY                                                                                                                                                        | RESULTS                                                                                                                                                                                                           | BIOLOGICAL<br>EFFECT         | SURFACE<br>MARKERS                                                             |
|---------------------------|----------------------------------------------------------|----------------------|-------------------------------------------------------------------------------------------------------------------------------------------------------------------------------------------------------------------------|-----------------------|------------------------------------------------------------|--------------------------------------------------------------------------------------------------------------------------------------------------------------------|-------------------------------------------------------------------------------------------------------------------------------------------------------------------------------------------------------------------|------------------------------|--------------------------------------------------------------------------------|
| Schmidt-Lucke C et al (1) | Atherosclerosis                                          | Vivo                 | Circulating EPC provide an endogenous repair mechanism to counteract ongoing risk factor-induced endothelial injury                                                                                                     | 120 Patients          | Peripheral blood                                           | Flow cytometry and immunochemistry                                                                                                                                 | Reduced levels of circulating EPCs independently predict atherosclerotic disease progression                                                                                                                      | Prognostic effect            | CD34+KDR+                                                                      |
| Croce G et al. (2)        | Hypercholesterolemia                                     | Vivo                 | Evaluation whether or not changes in dietary habits, alone or in association with regular physical activity, were able to affect the number of circulating EPCs in patients with isolated hypercholesterolemia          | 38 Patients           | Peripheral blood                                           | Flow cytometry and immunochemistry                                                                                                                                 | Nonpharmacological treatment of hypercholesterolemia increases circulating endothelial progenitor cell population in adults                                                                                       | Therapeutic effect           | DiI-acLDL and FITC-labeled Ulex-lectin                                         |
| Vasa M et al. (3)         | Stable coronary disease                                  | Vivo                 | Circulating bone marrow-derived endothelial progenitor cells (EPCs) were shown to augment the neovascularization of ischemic tissue                                                                                     | 15 Patients           | Peripheral blood                                           | Flow cytometry and immunochemistry                                                                                                                                 | Statin treatment in patients with stable CAD induced the increasing of circulating EPCs with enhanced functional activity                                                                                         | Therapeutic effect           | CD34, CD133, and CD34/kinase insert domain receptor                            |
| Yao L. et al (4)          | Atherosclerosis                                          | Vivo (Animals Study) | Role of EPC in atherosclerotic plaque regression                                                                                                                                                                        | Mice                  | Aortic samples                                             | Immunofluorescence                                                                                                                                                 | EPC reduce the progression of atherosclerotic plaque                                                                                                                                                              | Therapeutic effect           | Tie2-GFP(+)                                                                    |
| Eirin et al. (5)          | Essential Hypertension                                   | Vivo                 | Relationship between EPC and essential hypertension in black patients                                                                                                                                                   | 38 Patients           | Peripheral blood, inferior vena cava and renal vein sample | Flow cytometry and immunochemistry                                                                                                                                 | Increased release of cytokines and inflammatory endothelial cells (IECs) in black EH patients may impair EPC reparative capacity and aggravate vascular damage, and accelerate hypertension-related complications | Prognostic effect            | CD34+KDR+ (EPC) and VAP-1+ (IEC)                                               |
| Braitsch CM et al. (6)    | Hypertensive heart disease                               | Vitro                | Role of EPC in fibrosis associated with hypertension                                                                                                                                                                    | Mice                  | Cardiac specimens                                          | Immunochemistry                                                                                                                                                    | Aparticular phenotype of EPC, Tcf 21 positive, are involved in cardiac fibrosis associated with hypertension                                                                                                      | Physiopathological mechanism | Wt1, Tbx18, and Tcf21                                                          |
| Ling L. et al. (7)        | Acute myocardial infarction and type 2 diabetes mellitus | Vivo (Animal Study)  | Relationship between type 2 diabetes and EPC in patient with myocardial infarction                                                                                                                                      | 62 Patients and mices | Peripheral blood                                           | Flow cytometry and immunochemistry                                                                                                                                 | Bone marrow EPCs mobilization is delayed and reduced in diabetes                                                                                                                                                  | Prognostic effect            | CD45 <sup>-</sup> /low/CD34 <sup>+</sup> /CD133 <sup>+</sup> /KDR <sup>+</sup> |
| Caballero S et al (8)     | Retinal vascular injury                                  | Vivo (Animal Study)  | Effect on retinal vascular homing of exogenous CD34(+) and CD14(+) progenitor cells using mouse models of chronic (streptozotocin [STZ]-induced diabetes) and acute (ischemia-reperfusion [I/R]) ocular vascular injury | Mice                  | Mice retinal fragments                                     | Injection of Human CD34 <sup>+</sup> and CD14 <sup>+</sup> Peripheral Blood Mononuclear Cells and Murine Mesenchymal Stem Cells<br>Fluorescent Immunoistochemistry | Co-administration with MSCs or ex vivo fucosylation may enhance utility of CD34(+) cells in cell therapy for diabetic ocular conditions like macular ischemia and retinal nonperfusion                            | Therapeutic effect           | CD34(+) and CD14(+)                                                            |
| Wan J et al (9)           | Diabetic foot ulcer                                      | Vivo (Animal Study)  | Therapeutic effect of intramuscular transplantation of bone-marrow derived mesenchymal stem cells (BM-MSCs) in the leg for treatment of diabetic foot ulcers (DFUs) in rats                                             | Wistar rats           | Wound tissue samples                                       | Immunohistochemistry, ELISA and RT-PCR                                                                                                                             | Intramuscular transplantation of BM-MSCs can significantly promote wound healing of DFUs in rats possibly as a result of increased expression of VEGF in the wound tissues                                        | Therapeutic effect           | CD31 and Ki-67                                                                 |
| Alba AC et al. (10)       | Heart failure                                            | Vivo                 | Association between serial measurements of EPCs and functional capacity and outcomes in heart failure                                                                                                                   | 156 Patients          | Peripheral blood                                           | Flow cytometry and immunochemistry                                                                                                                                 | Changes in circulating progenitor cells are associated with outcome in heart failure patients                                                                                                                     | Prognostic effect            | CD34+, VEGFR2+ and/or CD133+                                                   |
| Padfield et al. (11)      | Coronary artery disease                                  | Ex Vivo              | Correlation between EPC phenotype CD34(+)VEGFR-2(+)andCD34(+)VEGFR2(+)CD133(+) and severity of coronary artery disease                                                                                                  | 201 Patients          | Peripheral blood                                           | Flow cytometry and immunochemistry                                                                                                                                 | Traditional EPC populations, are not related to the extent of CAD or clinical outcome                                                                                                                             | Prognostic effect            | C CD34(+)CD45(-)                                                               |
| Flammer AJ et al. (12)    | Unstable Atherosclerosis                                 | Vivo                 | Analysis of expression of osteoblastic marker osteocalcin + (OCN+) EPCs in patients with risk factors and a history of unstable atherosclerosis                                                                         | 282 Patients          | Peripheral blood                                           | Flow cytometry and immunochemistry                                                                                                                                 | Circulating OCN+ 'early' EPCs are strongly associated with unstable atherosclerosis                                                                                                                               | Prognostic effect            | OCN+/CD133+/CD34-/KDR+                                                         |
| Kunz GA et al (13)        | Coronary artery disease                                  | Vivo                 | Role of EPCs in coronary artery disease.                                                                                                                                                                                | 122 Patients          | Peripheral blood                                           | Flow cytometry and cell culture                                                                                                                                    | Inverse relationship between circulating EPCs and CAD severity                                                                                                                                                    | Prognostic effect            | CD34(+)CD45(-)                                                                 |
| Chan KH et al (14)        | Coronary disease                                         | Vivo                 | Relationship between EPC populations and coronary epicardial and microvascular disease                                                                                                                                  | 31 Patients           | Peripheral blood                                           | Flow cytometry and cell culture                                                                                                                                    | The number and the function of late EPC is associated with CAD severity                                                                                                                                           | Prognostic effect            | CD34+/KDR+<br>CD34+/CD45+<br>CD34+/CD45-                                       |

|                               |                               |                     |                                                                                                                                                                     |              |                      |                                                                |                                                                                                                                                                                                                                                                                |                              |                                                                          |
|-------------------------------|-------------------------------|---------------------|---------------------------------------------------------------------------------------------------------------------------------------------------------------------|--------------|----------------------|----------------------------------------------------------------|--------------------------------------------------------------------------------------------------------------------------------------------------------------------------------------------------------------------------------------------------------------------------------|------------------------------|--------------------------------------------------------------------------|
| D'Amario et al. (15)          | Coronary bypass surgery       | Vivo                | Relationship between ventricular remodelling and EPC after coronary bypass surgery                                                                                  | 38 Patients  | Peripheral blood     | Flow cytometry and immunochemistry                             | EPC represent a novel biomarker able to predict the evolution of ischemic cardiomyopathy following revascularization                                                                                                                                                           | Prognostic effect            | CD34, CD45<br>CD90, CD105<br>IGF-1Rs                                     |
| Taguchi A et al. (16)         | Cerebral Ischemia             | Vivo                | Diminished numbers of circulating immature cells might impair such physiological and reparative processes, potentially contributing to cerebrovascular dysfunction. | Patients     | Peripheral blood     | Flow cytometry and immunochemistry                             | A possible contribution of circulating CD34- and CD-133 positive cells in maintenance of cerebral circulation in setting ischemic stress.                                                                                                                                      | Prognostic effect            | CD34-, CD133-, CD117-, and CD135+                                        |
| Chu K et al. (17)             | Cerebral Ischemia             | Vivo/Vitro          | Validation of the significance of colony-forming unit (CFU) and outgrowth cell yield in acute stroke.                                                               | Patients     | Peripheral blood     | Flow cytometry, cell culture and immunochemistry               | CFU number may thus represent an accumulated endothelial progenitor cell dysfunctional status, whereas outgrowth cell appearance may reflect the resilience of the systemic circulation to acute ischemic stress.                                                              | Prognostic effect            | DiL-LDL, staining for UEA-1 lectin, CD31, VE-cadherin, CD34, and KDR     |
| Sobrinho T et al. (18)        | Cerebral Ischemia             | Vivo/vitro          | Evaluation of the prognostic value of EPC in acute ischemic stroke                                                                                                  | Patients     | Peripheral blood     | Flow cytometry, cell culture and immunochemistry               | Increasing of circulating EPC after acute ischemic stroke is associated with good functional outcomes and reduced infarct growth.                                                                                                                                              | Prognostic effect            |                                                                          |
| Bogoslovsky et al (19)        | Cerebral Ischemia             | Vivo                | Correlation between EPC and ischemic lesion volume at baseline, lesion growth and final lesion volume                                                               | Patients     | Peripheral blood     | Flow cytometry and immunochemistry and MRI                     | Higher EPC levels were indicative of smaller volumes of acute lesion, final lesion, and lesion growth and may serve as a markers of acute phase stroke severity.                                                                                                               | Prognostic effect            | CD34+CD133+, CD133+VEGFR2+, and CD34+ CD133+VEGFR2+                      |
| Vaturi et al. (20)            | Bicuspid aortic valve         | Vivo                | Comparison of EPC level and function in patients with BAV with versus without valve dysfunction.                                                                    | 22 Patients  | Peripheral blood     | Flow cytometry and immunotype characterization                 | Patients with BAV and significant valve dysfunction appear to have circulating EPCs with impaired functional properties                                                                                                                                                        | Physiopathological mechanism | CD133 and CD34                                                           |
| Shimoni S. et al (21)         | Aortic regurgitation          | Vivo                | The aim of the present study was to assess the number and role of EPCs in patients with aortic valve regurgitation (AR).                                            | 31 Patients  | Peripheral blood     | Flow cytometry and immunotype characterization                 | Patients with AR have fewer EPCs and late apoptotic EPCs                                                                                                                                                                                                                       | Physiopathological mechanism | CD34+/KDR+                                                               |
| Van Spyk et al. (22)          | Abdominal aortic aneurysm     | Vivo                | CD34+ cells in patients with Abdominal Aortic Aneurysm (AAA) versus Peripheral Vascular Disease (PVD)                                                               | 24 Patients  | Peripheral blood     | Flow cytometry and immunochemistry                             | The AAA patients had a greater percentage of CD34+ cells compared with PVD patients AAA is a less severe vascular disease than PVD                                                                                                                                             | Prognostic effect            | CD34+                                                                    |
| Schneider F et al (23)        | Abdominal aortic aneurysm     | Vitro               | This study tested the hypothesis that bone marrow-derived MSCs (BM-MSCs) stabilizes AAAs in a rat model                                                             | Rat Fisher   | Cell culture         | Cell culture and immunochemistry                               | BM-MSCs exert a specialized function in arterial regeneration that transcends that of mature mesenchymal cells                                                                                                                                                                 | Therapeutic effect           | SM-alpha active positive cell                                            |
| Li ZF et al (24)              | Aneurysm                      | Vivo (Animal Study) | EPCs contribute to neointima formation and reendothelialization in rabbit elastase-induced aneurysm after flow diverter treatment.                                  | Rabbit       | Mice aortic fragment | Injection of Autologous EPC and Fluorescent Immunistochemistry | BM-derived EPCs participate in neointima formation in elastase-induced aneurysm after flow diverter treatment.                                                                                                                                                                 | Therapeutic effect           | Hoechst 33,342 and CFSE(carboxyfluorescein diacetate succinimidyl ester) |
| Grochot-Przeczek A et al (25) | Peripheral artery disease     | Review              | Role of EPC in peripheral artery ischemia                                                                                                                           |              |                      |                                                                |                                                                                                                                                                                                                                                                                |                              |                                                                          |
| Chan YH et al (26)            | Prolongation of PR interval   | Vivo                |                                                                                                                                                                     | 348 Patients | Peripheral blood     | Flow cytometry                                                 | PR prolongation is associated with endothelial dysfunction and evidence of endothelial repair activation in patients with high cardiovascular risk                                                                                                                             | Therapeutic effect           | CD133(+)/KDR(+)                                                          |
| Oterino et al. (27)           | Chronic Migraine              | Vivo                | Analysis expressing e-selectin, to assess endothelial activation and, therefore, endothelial dysfunction in migraine.                                               | 99 Patients  | Peripheral blood     | Flow cytometry and immunochemistry                             | CD62E+ EPCs might be considered a marker for vascular damage in migraine patients                                                                                                                                                                                              | Prognostic effect            | CD34+/KDR+ "early" EPCs those CD62E- EPCs, and "late" EPCs, CD62E+       |
| Condorelli RA et al (28)      | Arterial erectile dysfunction | Vivo                | Relationship between low pharmacological response to phosphodiesterase type 5 inhibitors and EPC                                                                    | 30 Patients  | Peripheral blood     | Flow cytometry and immunochemistry                             | Non responder" patients showed a significant higher severity of penile arterial insufficiency and finally a significant higher level of endothelial apoptosis associated with higher serum concentrations of circulating late immunophenotype of endothelial progenitor cells. | Prognostic effect            | CD45neg/CD34pos/CD144pos<br>CD45neg/CD144pos/Annexin Vpos                |
| Rodrigo M et al. (29)         | Sickle cell diseases          | Vivo                | Relationship between EPC and sickle cell disease                                                                                                                    | 24 Patients  | Peripheral blood     | Flow cytometry and immunochemistry                             | Low levels of EPC in patients with sickle cell disease increase the risk of cardiovascular disease                                                                                                                                                                             | Prognostic effect            |                                                                          |

## References

1. Schmidt-Lucke C, Rossing L, Fichtlscherer S, et al. Reduced number of circulating endothelial progenitor cells predicts future cardiovascular events. *Circulation*. 2005;111:2981-2987.
2. Croce G, Passacquale G, Necozone S, et al. Nonpharmacological treatment of hypercholesterolemia increases circulating endothelial progenitor cell population in adults. *Arterioscler Thromb Vasc Biol* 2006; 26: e38-e39.
3. Vasa M, Fichtlscherer S, Adler K, et al. Increase in circulating endothelial progenitor cells by statin therapy in patients with stable coronary artery disease. *Circulation* 2001;103:2885-2890.
4. Yao L, Heuser-Baker J, Herlea-Pana O, et al. Bone marrow endothelial progenitors augment atherosclerotic plaque regression in a mouse model of plasma lipid lowering. *Stem Cells*. 2012 Dec;30:2720-2731.
5. Eirin A, Zhu XY, Woollard JR, et al. Increased circulating inflammatory endothelial cells in blacks with essential hypertension. *Hypertension*. 2013 Sep;62:585-591.
6. Braitsch CM, Kanisicak O, van Berlo JH, et al. Differential expression of embryonic epicardial progenitor markers and localization of cardiac fibrosis in adult ischemic injury and hypertensive heart disease. *J Mol Cell Cardiol*. 2013;65:108-119.
7. Ling L, Shen Y, Wang K, et al. Worse clinical outcomes in acute myocardial infarction patients with type 2 diabetes mellitus: relevance to impaired endothelial progenitor cells mobilization. *PLoS One*. 2012;7(11).
8. Caballero S, Hazra S, Bhatwadekar A, et al. Circulating mononuclear progenitor cells: differential roles for subpopulations in repair of retinal vascular injury. *Invest Ophthalmol Vis Sci*. 2013 Apr 26;54:3000-3009.
9. Wan J, Cai Q, Liu Y. Effect of intramuscular bone marrow-derived mesenchymal stem cell transplantation in the leg for treatment of diabetic foot ulcers in rats. *Nan Fang Yi Ke Da Xue Xue Bao*. 2012;32:1730-1736
10. Alba AC, Lalonde SD, Rao V, Walter SD, Guyatt GH, Ross HJ. Changes in circulating progenitor cells are associated with outcome in heart failure patients: a longitudinal study. *Can J Cardiol*. 2013;29:1657-1664.
11. Padfield GJ, Tura-Ceide O, Freyer E, et al. Endothelial progenitor cells, atheroma burden and clinical outcome in patients with coronary artery disease. *Heart*. 2013;99:791-798.
12. Flammer AJ, Gössl M, Widmer RJ, et al. Osteocalcin positive CD133+/CD34-/KDR+ progenitor cells as an independent marker for unstable atherosclerosis. *Eur Heart J*. 2012;33:2963-2969.
13. Kunz G, Liang G, Cuculi F, et al. Circulating endothelial progenitor cells predict coronary artery disease severity. *Am Heart J* 2006;152:190-195
14. Chan KH, Simpson P, Yong AS, et al. The Relationship between Endothelial Progenitor Cell Population and Epicardial and Microvascular Coronary Disease- A Cellular, Angiographic and Physiologic Study. *PLoS One* 2014;9:e 93980.
15. D'Amario D, Leone AM, Iaconelli A, et al. Growth Properties of Cardiac Stem Cells Are a Novel Biomarker of Patients' Outcome After Coronary Bypass Surgery. *Circulation*. 2013; 129:157-172.
16. Taguchi A, Matsuyama T, Moriwaki H, et al. Circulating CD34-positive cells provide an index of cerebrovascular function. *Circulation*. 2004;109:2972-2975.

17. Chu K, Jung KH, Lee ST et al. Circulating endothelial progenitors cells as a new marker of endothelial dysfunction or repair in cute stroke. *Stroke* 2008;39:1441-1447.
18. Sobrino T, Hurtado O, Moro MA, et al. The increase of circulating endothelial progenitor cells after acute ischemic stroke is associated with good outcome. *Stroke* 2007;38:2759-2764.
19. Bogoslovsky. Endothelial progenitor cells correlate with lesion volume and growth in acute stroke. *Neurology*. 2010;75:2059-2062.
20. Vaturi M, Perl L, Leshem-Lev D, et al. Circulating endothelial progenitor cells in patients with dysfunctional versus normally functioning congenitally bicuspid aortic valves. *Am J Cardiol* 2011; 108: 272 – 276.
21. Shimoni S, Bar I, Zilberman L, et al. Circulating progenitor and apoptotic progenitor cells in patients with aortic regurgitation. *Circ J*. 2013;77:764-771.
22. Van Spyk EN, Chun KC, Samadzadeh KM, Peters JH, Lee ES. Increased levels of CD34+ cells are associated in patients with abdominal aortic aneurysms compared with patients with peripheral vascular disease. *J Surg Res*. 2013;184:638-643.
23. Schneider F, Saucy F, de Blic R, et al. Bone marrow mesenchymal stem cells stabilize already-formed aortic aneurysms more efficiently than vascular smooth muscle cells in a rat model. *Eur J Vasc Endovasc Surg*. 2013;45:666-672.
24. Li ZF, Fang XG, Yang PF, et al. Endothelial progenitor cells contribute to neointima formation in rabbit elastase-induced aneurysm after flow diverter treatment. *CNS Neurosci Ther*. 2013;19:352-357.
25. Grochot-Przeczek A, Dulak J, Jozkowicz A. Therapeutic angiogenesis for revascularization in peripheral artery disease. *Gene*. 2013;525:220-228.
26. Chan YH, Siu CW, Yiu KH, et al. Prolongation of PR interval is associated with endothelial dysfunction and activation of vascular repair in high-risk cardiovascular patients. *J Interv Card Electrophysiol*. 2013;37:55-61.
27. Oterino A, Toriello M, Palacio E, et al. Analysis of endothelial precursor cells in chronic migraine: a case-control study. *Cephalalgia*. 2013;33:236-244.
28. Condorelli RA, Calogero AE, Favilla V, et al. Arterial erectile dysfunction: different severities of endothelial apoptosis between diabetic patients "responders" and "non responders" to sildenafil. *Eur J Intern Med*. 2013;24:234-240.
29. Rodrigo M, Mendelsohn L, Bereal-Williams C, et al. Circulating endothelial progenitor cells in adults with sickle cell disease. *Pulm Circ*. 2013;3:448-449.
